# Supplementary material for: Genome-wide mapping reveals conserved and diverged R-loop activities in the unusual genetic landscape of the African trypanosome genome
Source: PubMed Central journal article supplement (PMC6294496; doi:10.1093/nar/gky928), 2018-10-10
Supplement: gky928_supplemental_files.pdf [file gky928_supplemental_files.pdf]

## Genome-wide mapping reveals conserved and diverged R-loop activities in the unusual genetic landscape of the African trypanosome genome

Emma Briggs, Graham Hamilton, Kathryn Crouch, Craig Lapsley and Richard McCulloch

### Supplementary figure and table legends

**Figure S1. *T. brucei* genome coverage by R-loops in wild type cells and in RNase H1 mutants.** A) Graph showing the number of bp found to be occupied by at least one DRIP enriched region in WT and *Tbrh1*<sup>-/-</sup> cells. B) Plot showing the number of enriched regions (y-axis) of each length (x-axis) identified within WT and *Tbrh1*<sup>-/-</sup> DRIP data sets.

**Figure S2. Genome-wide R-loop distribution in *T. brucei* and correlation with repetitive sequences.**

Screenshots of WT (pink) and *Tbrh1*<sup>-/-</sup> (green) DRIP signal over *T. brucei* megabase chromosomes 1-11; y-axis = 1-4 fold-change over input. Transcript annotations are shown above DRIP tracks, where sense-transcribed transcripts are in black and anti-sense in red. Known centromere regions are shown by peach circles over the transcript track. Lower track shows tandem repeats (navy blue).

**Figure S3. DRIP-seq mapping to mapped centromeres in chromosomes 1 to 8 in *T. brucei*.** Screenshots of WT (pink) and *Tbrh1*<sup>-/-</sup> (green) DRIP signal over each annotated centromere in *T. brucei* Mb chromosomes 1-8. CIR are shown in red, CDS as thick black lines and UTRs as thin black lines.

**Figure S4. DRIP-seq mapping to RNA Pol I transcribed procyclin and metacyclic VSG expression sites.** A) Screenshots of WT (pink) and *Tbrh1*<sup>-/-</sup> (green) DRIP-seq signal mapped to each of the five metacyclic VSG expression sites annotated in *T. brucei* strain Lister 427. Annotations as in Fig.1C; mVSG coding regions shown in red. B) Screenshot of WT (pink) and *Tbrh1*<sup>-/-</sup> (green) DRIP-seq signal mapped to a procyclin gene locus.

**Figure S5. DRIP-seq mapping to snoRNA genes in *T. brucei*.** Graph showing the number of DRIP enriched regions found at snoRNA loci (left) in WT and *Tbrh1*<sup>-/-</sup> cells, and a representative screenshot of the mapping (right).

**Figure S6. DRIP-seq mapping to retrotransposon hotspot genes in *T. brucei*.** Graph of DRIP enriched regions identified at retrotransposon hotspots (RHS) (left) in WT and *Tbrh1*<sup>-/-</sup> cells, and a representative screenshot of the mapping shown with histone H3 mapping (right).

**Figure S7. R-loop distribution in RNA Pol II transcribed regions of the *T. brucei* genome.** Representative screenshot of WT (pink) and *Tbrh1*<sup>-/-</sup> (green) DRIP signal enrichment at UTRs and intergenic regions within Pol II PTUs in chromosomes 2 (upper) and 7 (lower). Sequences and DRIP-seq mapping are shown as in Fig.1C, and data are shown for two biological replicates (Rep1 and Rep2).

**Figure S8. Limited gene expression changes are observed after TbrRH1 deletion.** A) RNA-seq analysis comparing normalised gene-specific RNA reads in *Tbrh1*<sup>-/-</sup> mutants relative to WT cells. VSG genes are shown in red and all other genes as black dot ('other'); values are shown as variance-stabilising transforms of reads per kilobase of transcript per million mapped reads. B) Relative RNA abundance for a selection of RNA Pol II transcribed genes is shown by RT-qPCR in *Tbrh1*<sup>-/-</sup> parasites compared with WT (where Ct value relative to a control gene is set at 1.0); error bars show SEM from three independent replicates.

**Figure S9. Analysis of R-loops that accumulate within the CDS of RNA Pol II transcribed genes.**A) Metaplot of WT DRIP signal over Pol II transcribed CDS (+/- 500 bp) for those genes identified as having a WT DRIP enriched region associated with the CDS (pink, R-loop), and those without (dashed pink, No R-loop). B) Metaplot of GC (red) and AT (blue) skew over CDS (+/- 500 bp) in genes of WT cells with at least one enriched DRIP region (solid lines, R-loop), and those without (dashed lines, No R-loop). C) Box plots of CDS length, mRNA half-life, and 5' and 3' UTR lengths, of Pol II transcripts with at least one DRIP enriched region associated with the CDS in WT and *Tbrh1*<sup>-/-</sup> data sets, and those without (No R loop).

**Figure S10. R-loop association with polyadenylation sites within RNA Pol II transcribed regions of *T. brucei*.** A) Representative screenshot of WT (pink) and *Tbrh1*<sup>-/-</sup> (green) DRIP signal and proximity with mapped PAS (blue; predominantly used PAS in dark blue) within a Pol II PTU in chromosome 7; data are shown for two biological replicates (Rep1 and Rep2). B) Metaplots and heatmaps of WT and *Tbrh1*<sup>-/-</sup> DRIP signal over the CDS +/- 1 kb of each Pol II transcribed gene, using data from replicate 2 (Rep 1 is shown in Fig.5A). C) Metaplots and heatmaps of WT DRIP signal over the mapped dominant and non-dominant polyadenylation sites (PAS), +/- 0.5 kb, of each Pol II transcribed gene. D) Metaplots and heatmaps of WT DRIP signal over the mapped dominant and non-dominant splice acceptor sites (SAS), +/- 0.5 kb, of each Pol II transcribed gene.

**Figure S11. Correlating R-loop localisation and base skew around the start codon of RNA Pol II genes in *T. brucei*.** Metaplots of WT DRIP signal (pink) compared to GC (A) and AT (B) skew (blue) over the ATG (+/- 500 bp) of the first gene of each Pol II PTU (left), and over the rest of the genes with the Pol II PTU (right).

**Figure S12. Correlating R-loop and transcription initiation-associated factor localisation around RNA Pol II gene SSRs in *T. brucei*.** WT DRIP signal (blue) metaplot is compared to H2A.Z (A), H4K10ac (B), H2B.V (C) and BDF3 (D) ChIP-seq (red) signal over divergent (left), head-to-tail (middle) and convergent (right) SSRs (+/- 8 kb).

**Figure S13. R-loop enrichment shows no correlation with histone variants associated with transcript termination.** Metaplots of WT DRIP signal (blue) compared to histone H3.V (A) and H4.V (B) ChIP-seq signal (red) over divergent (left), head-to-tail (middle) and convergent (right) SSRs (+/- 8 kb).

**Table S1.** GO terms enriched in genes with at least one DRIP-enriched region within the CDS.

**A**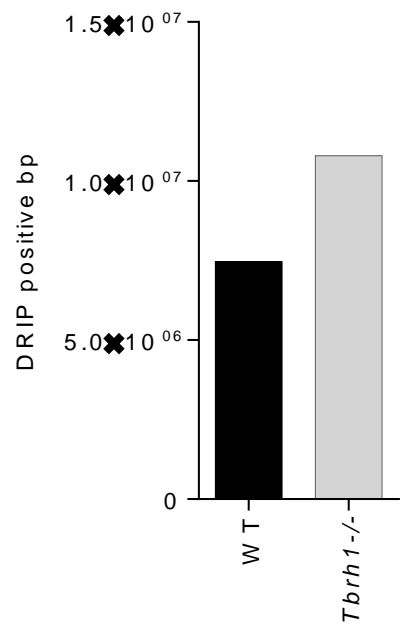**B**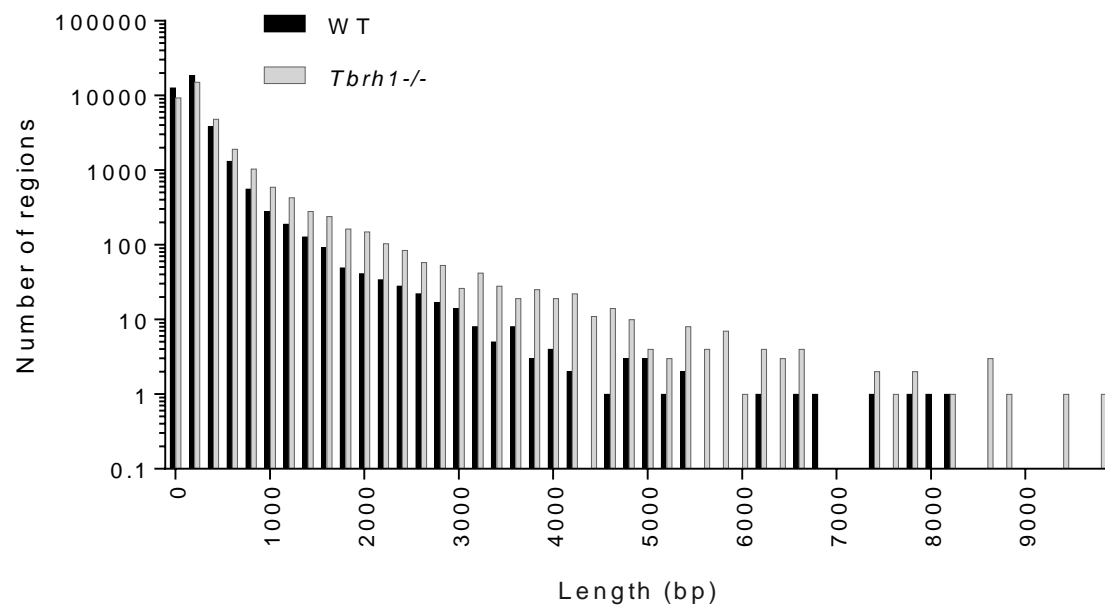

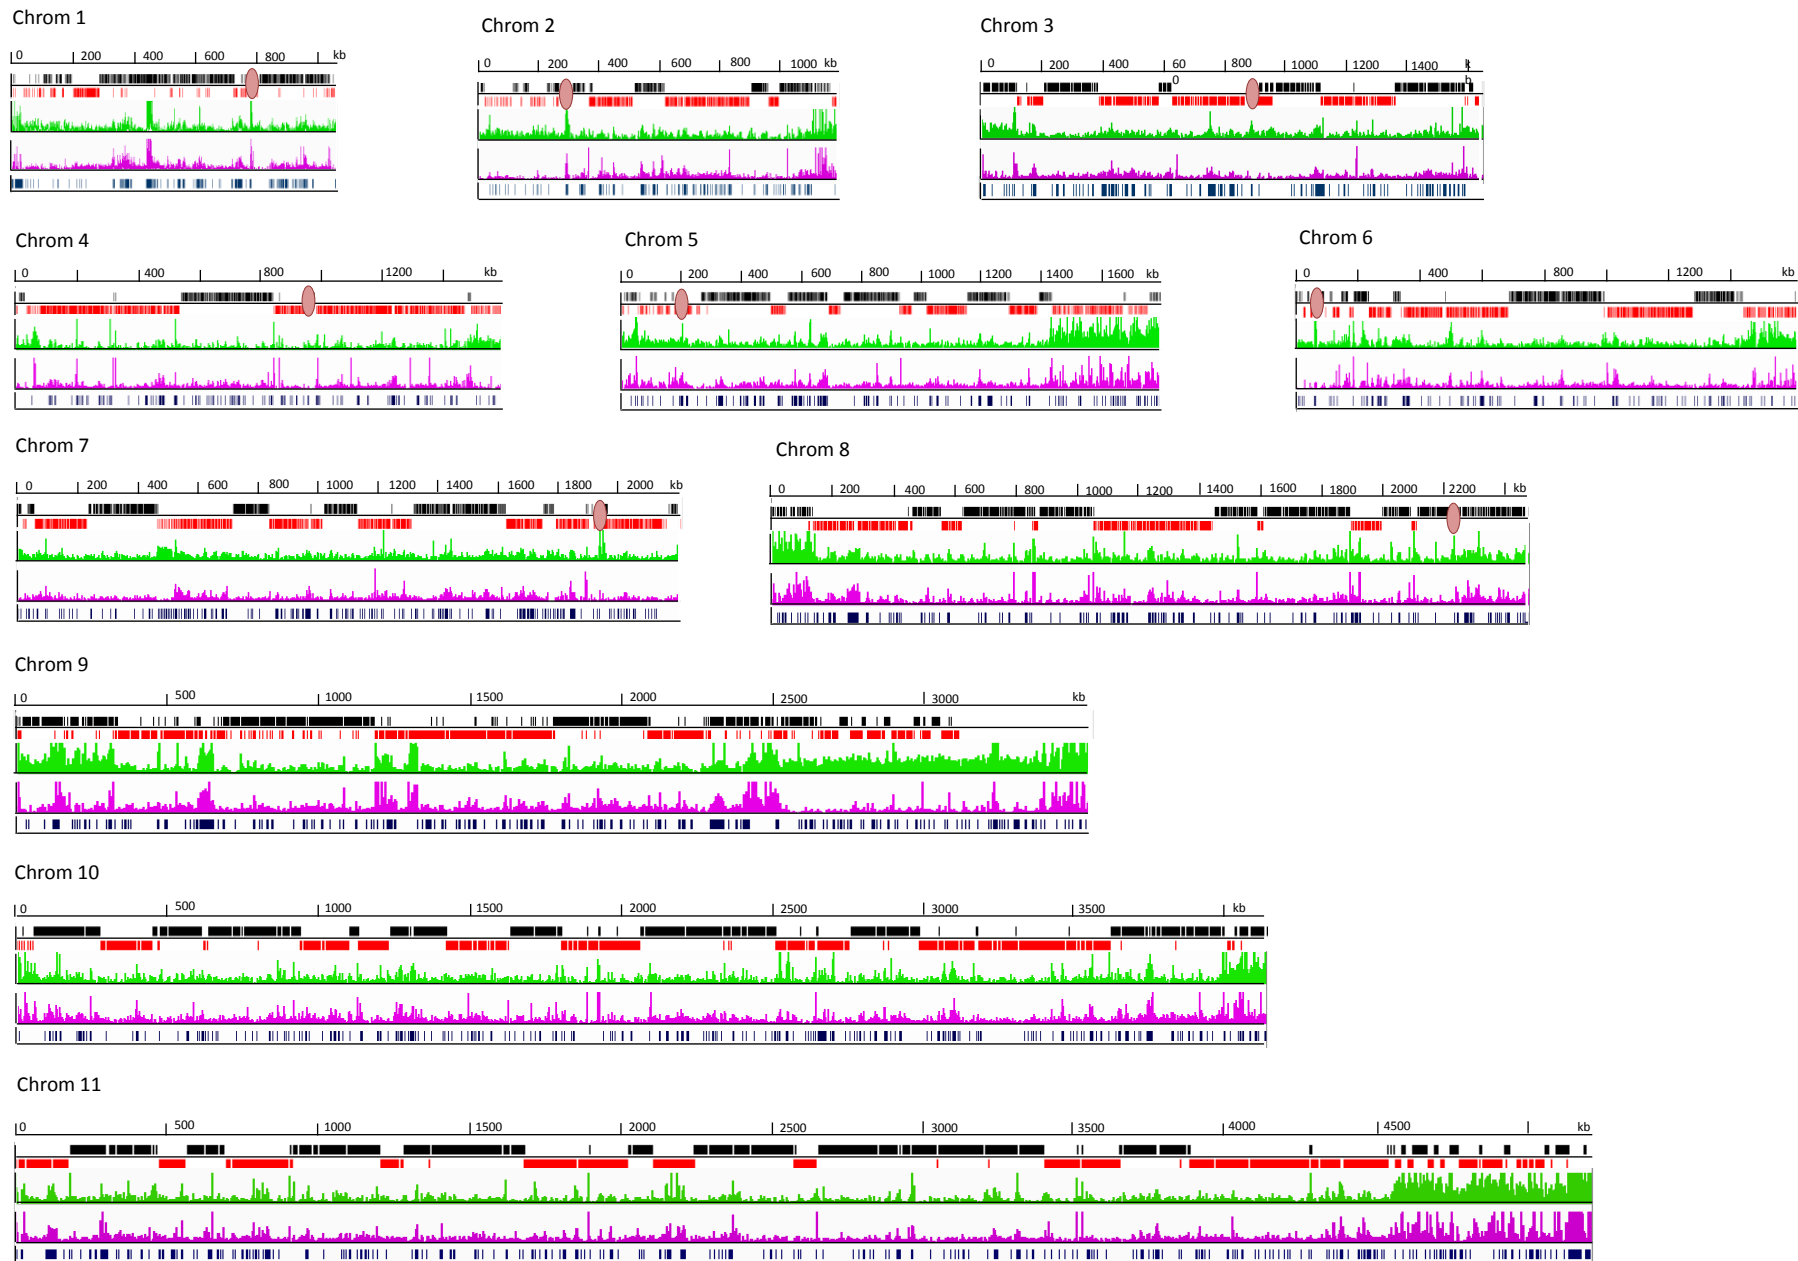

Fig.S2

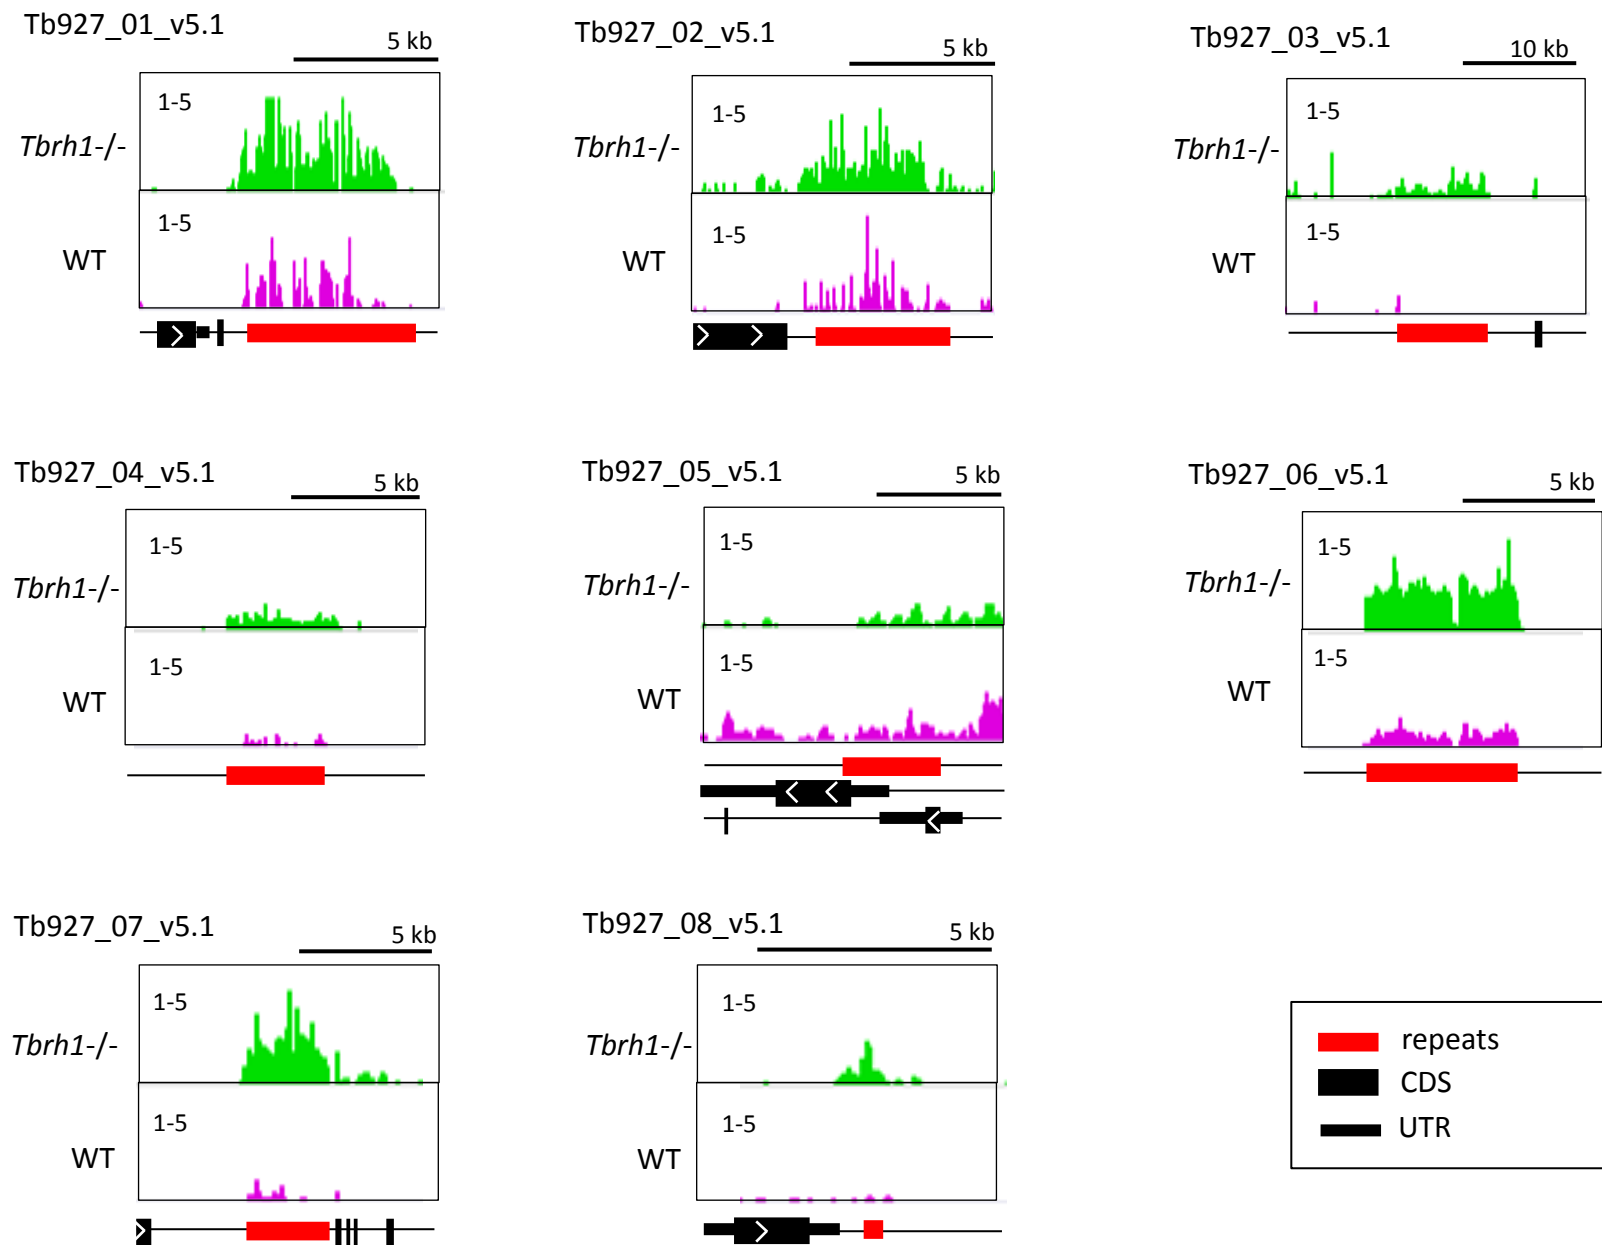

Fig.S3

A

mVSG531

mVSG639

mVSG1954

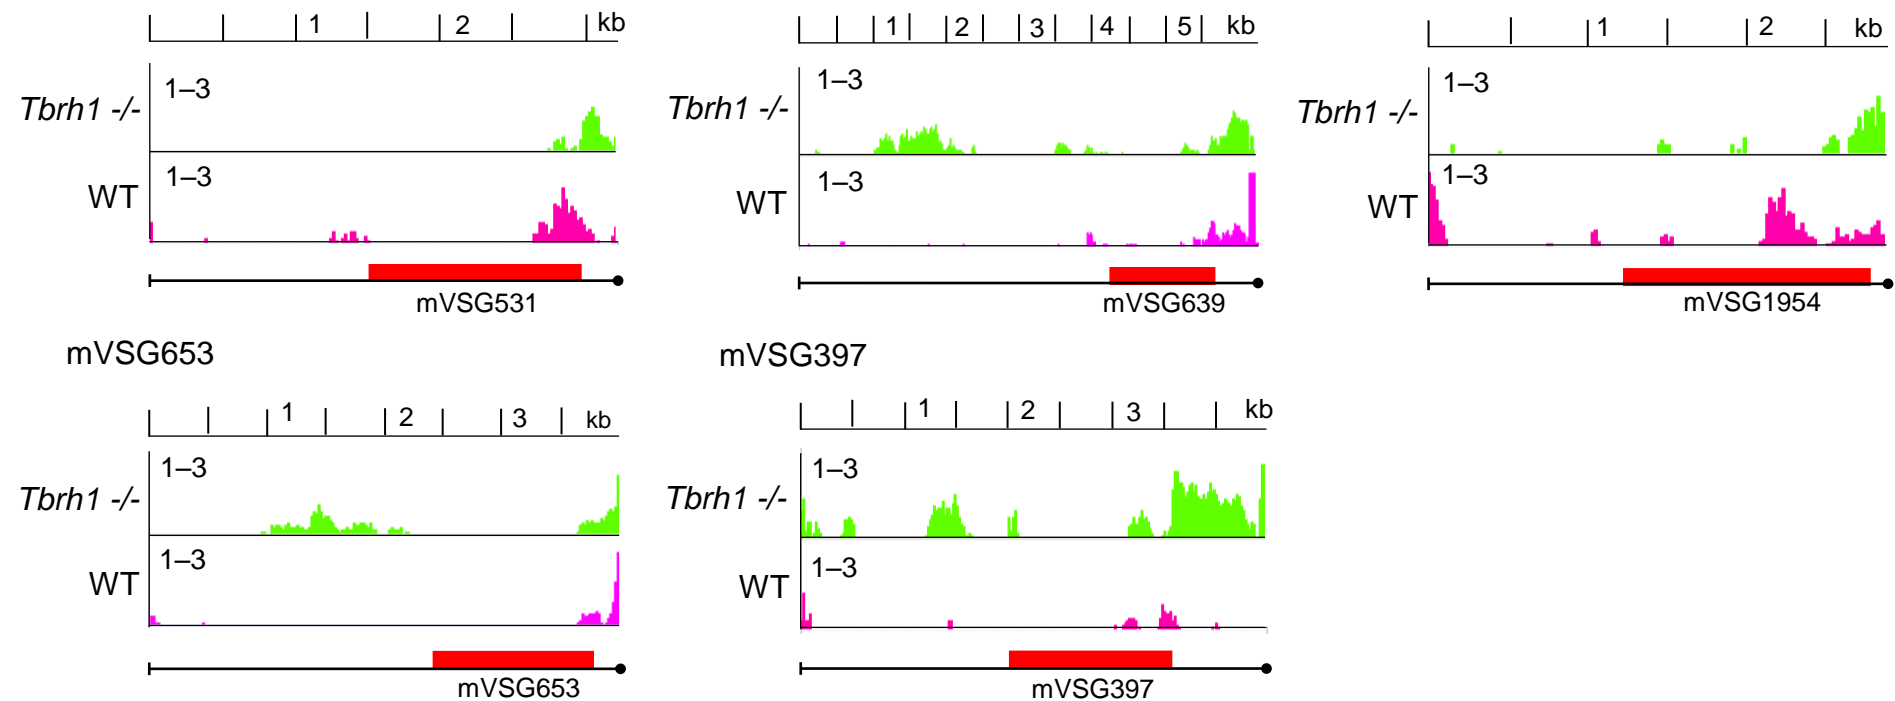

B

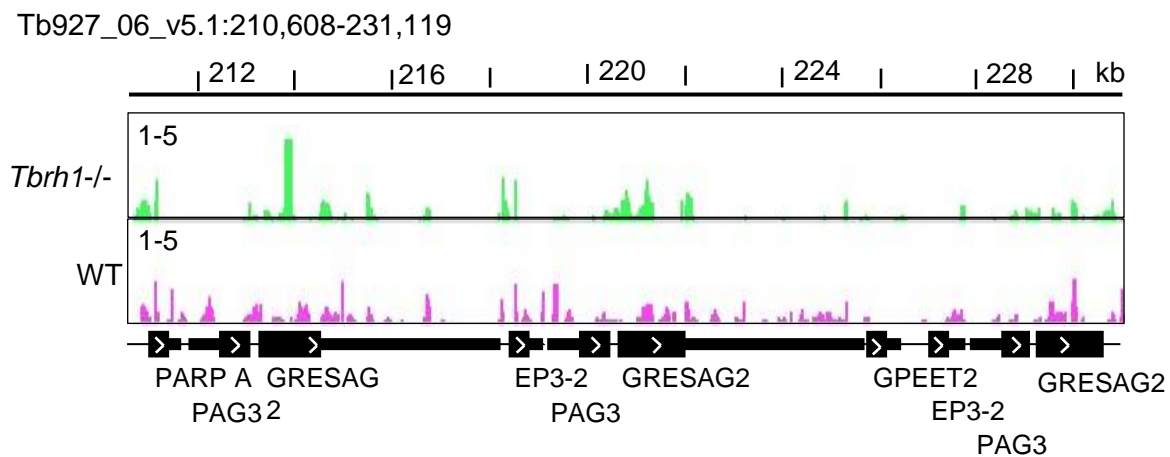

Fig.S4

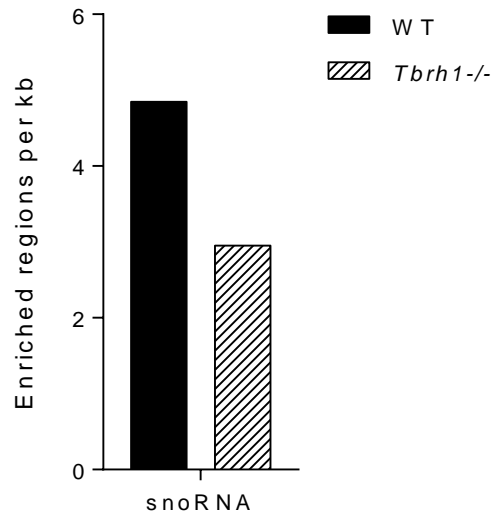

Tb927\_10\_v5.1:3,344,833-3,345,700

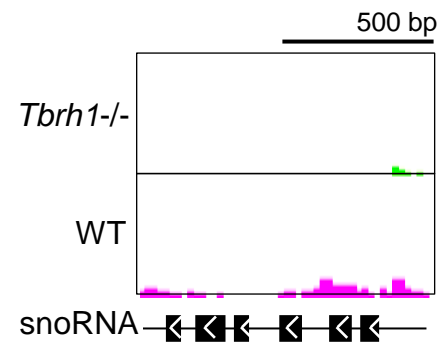

Fig.S5

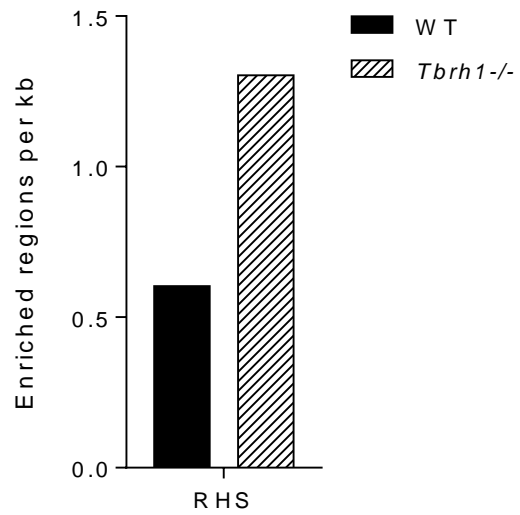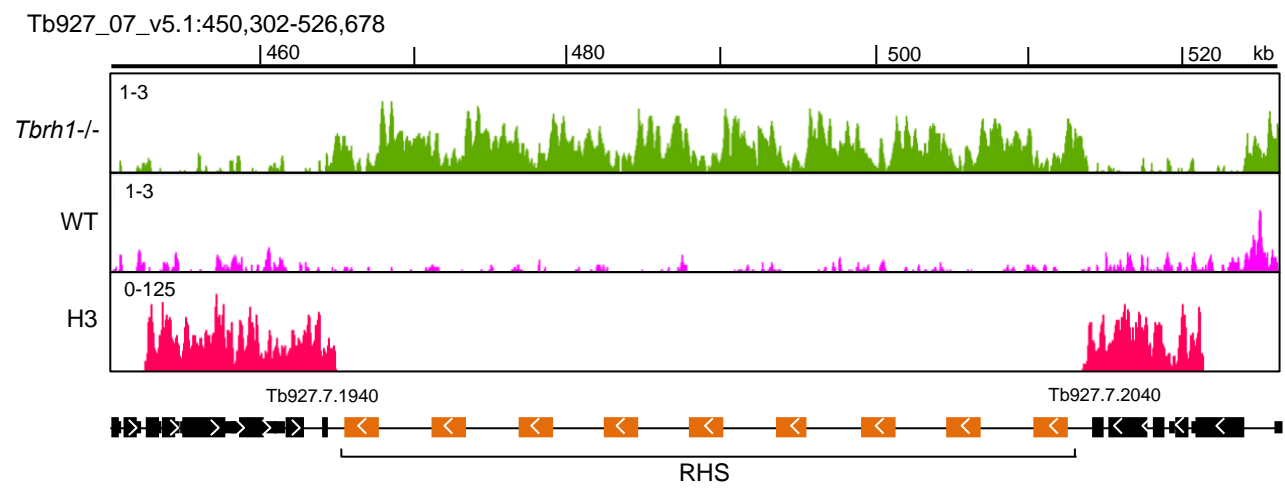

Fig.S6



Tb927\_02\_v5.1: 395,532 - 423,860

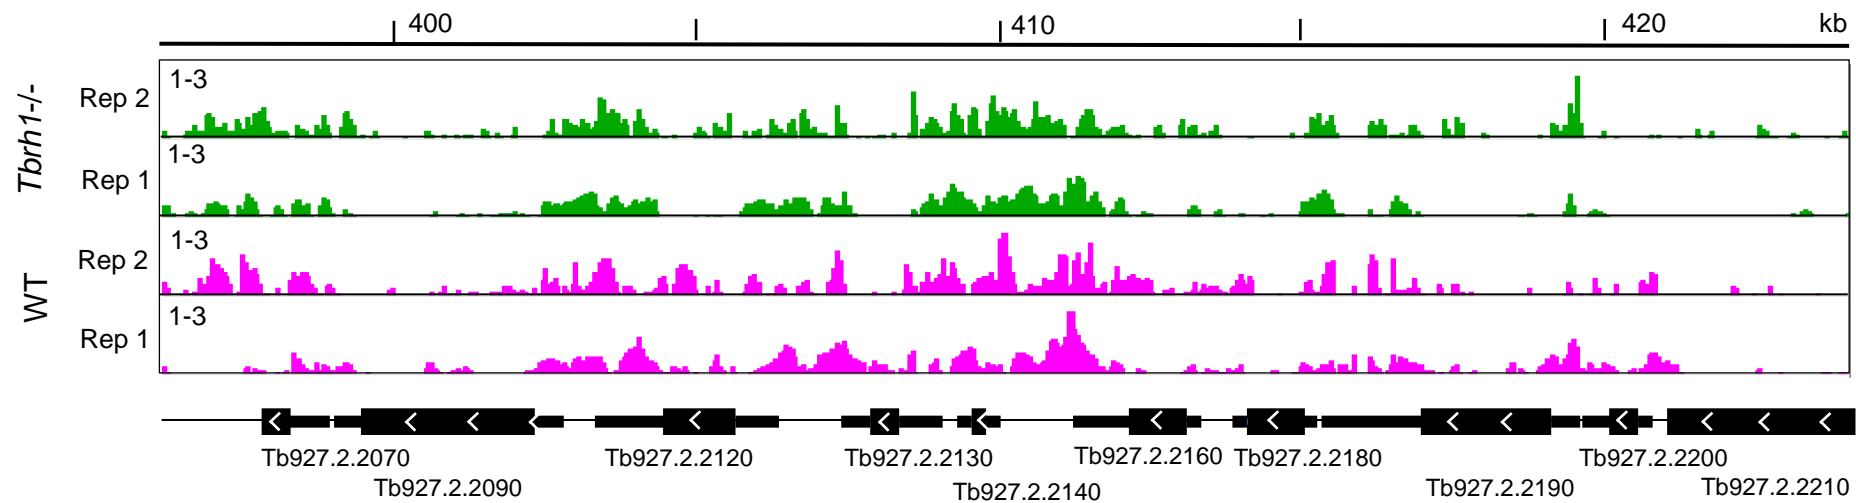

Tb927\_07\_v5.1: 1,060,679 - 1,130,083

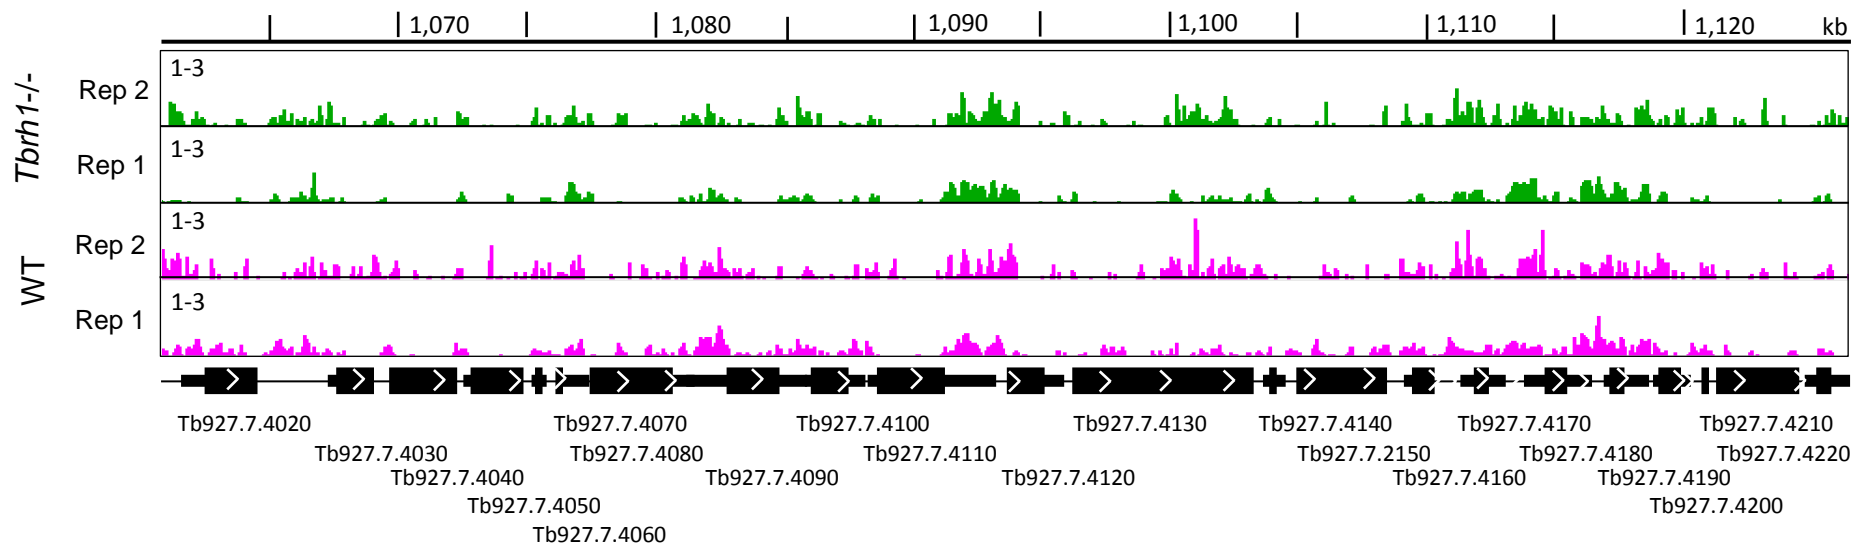

Fig.S7

A

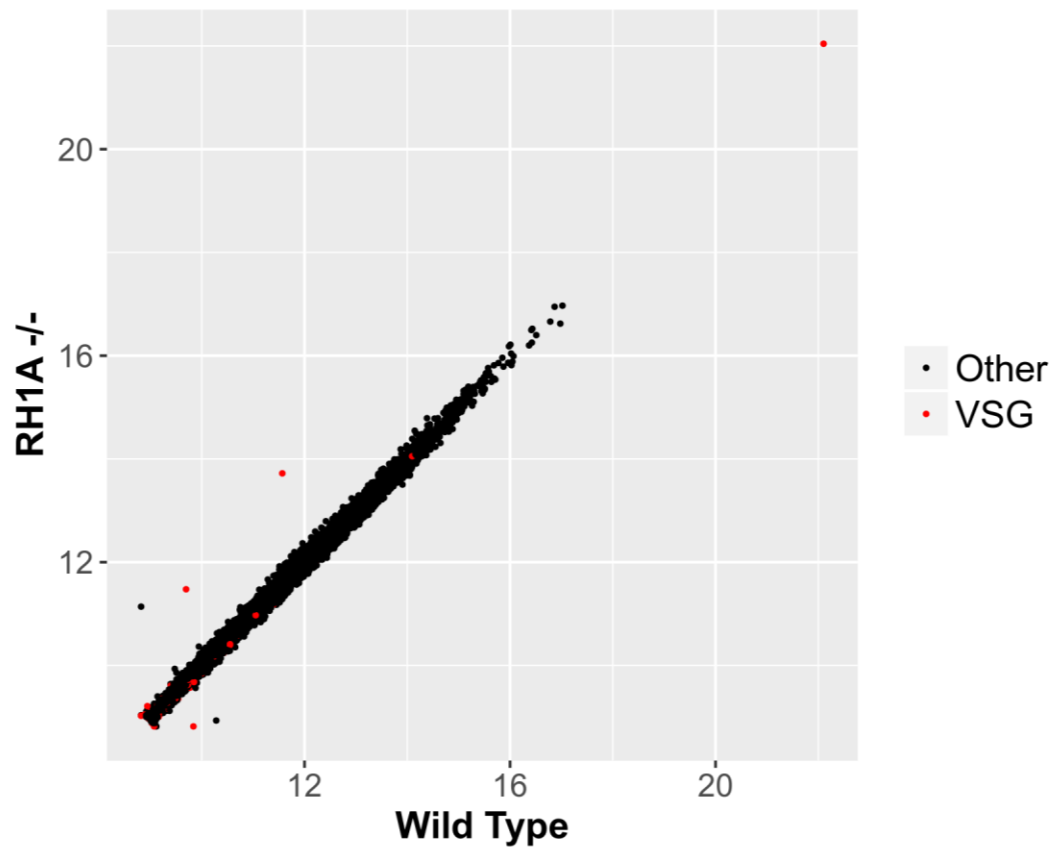

B

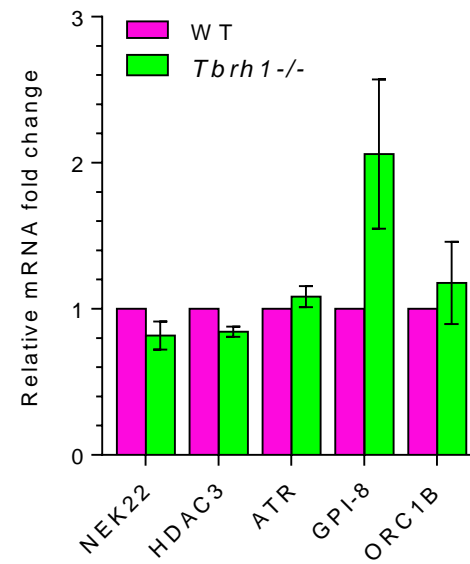

A

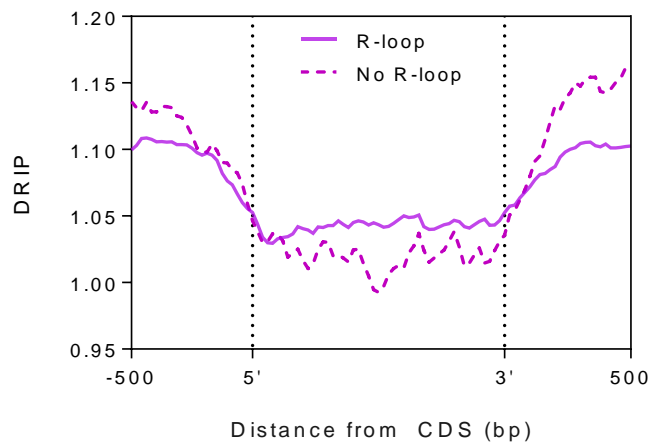

B

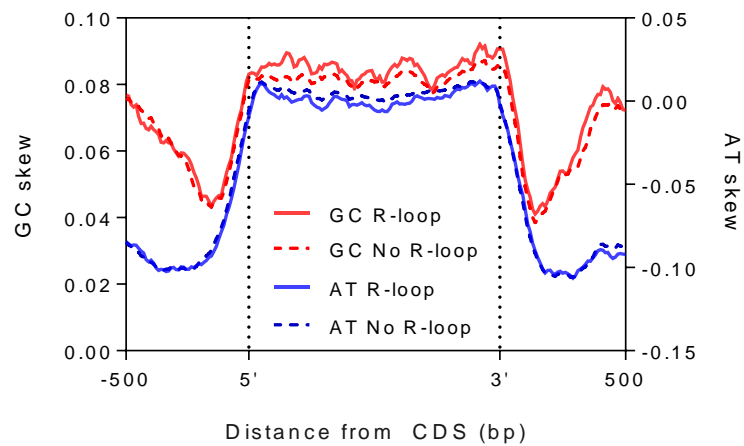

C

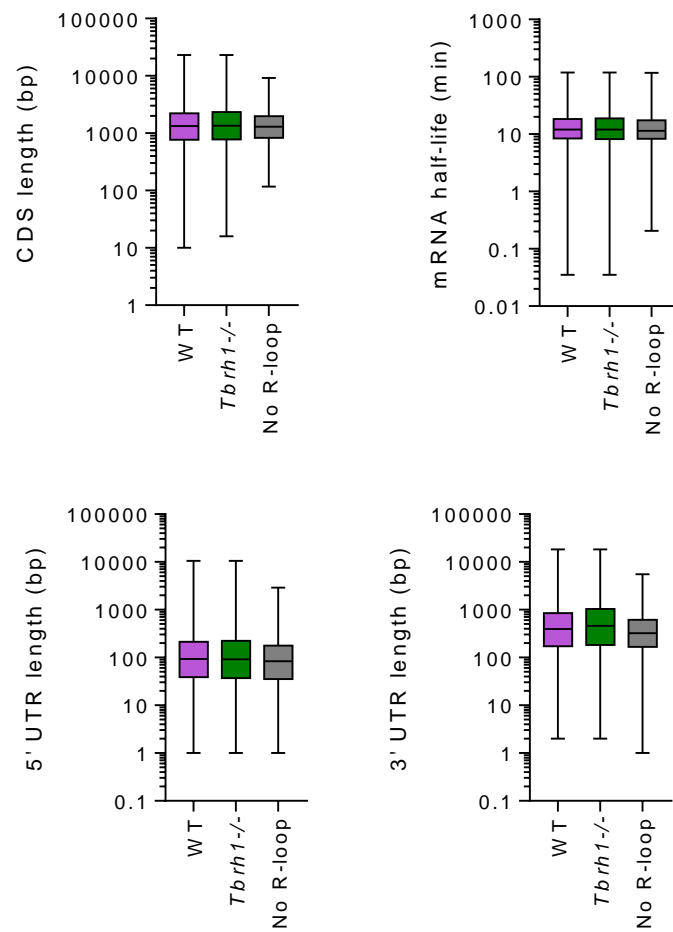

**A**

Tb927\_07\_v5.1:1,029,126-1,098,531

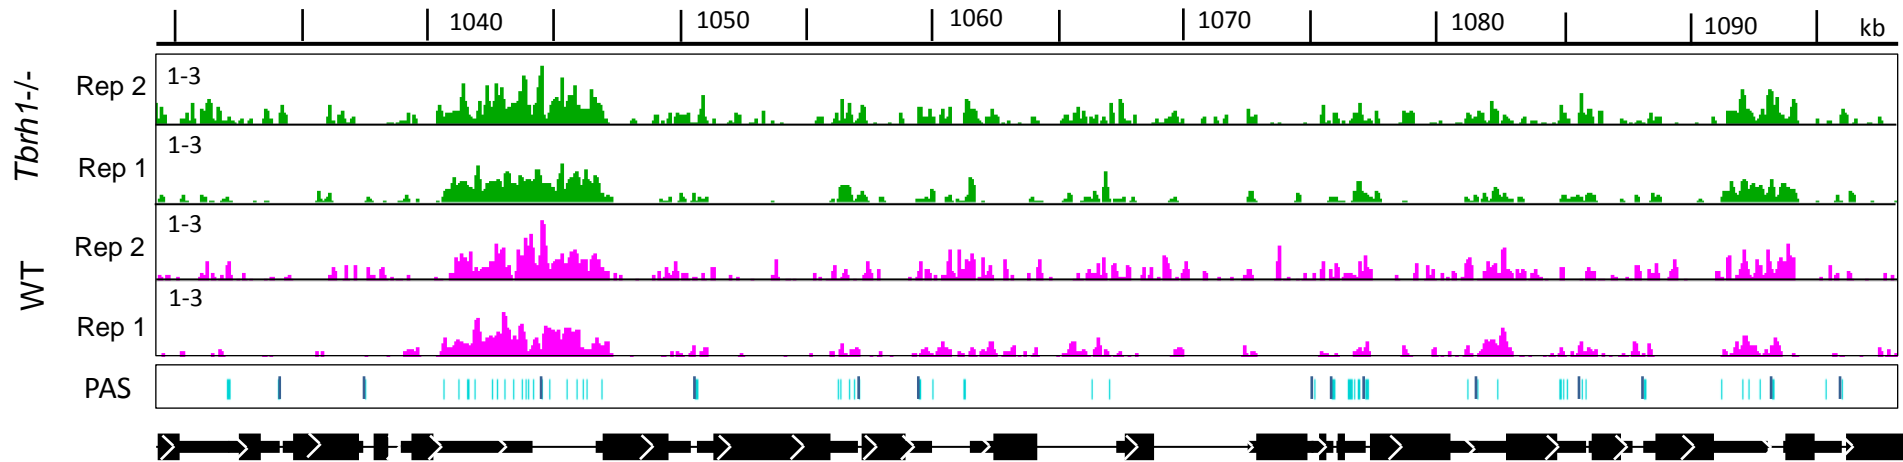**B**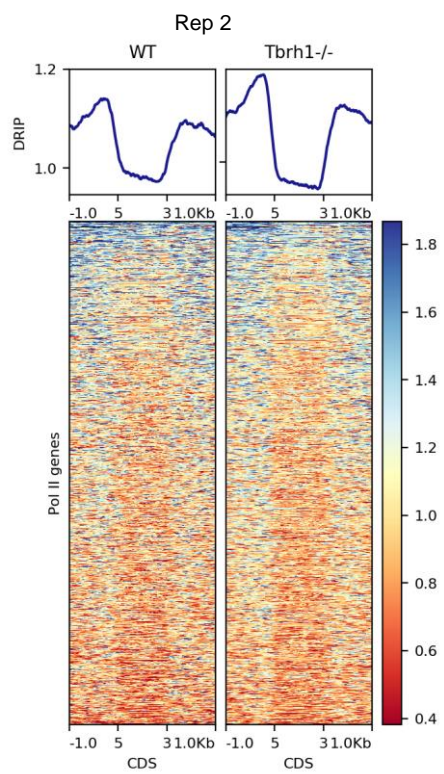**C**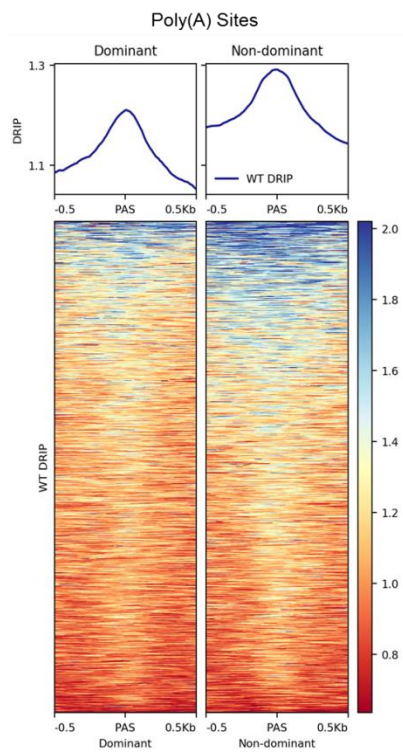**D**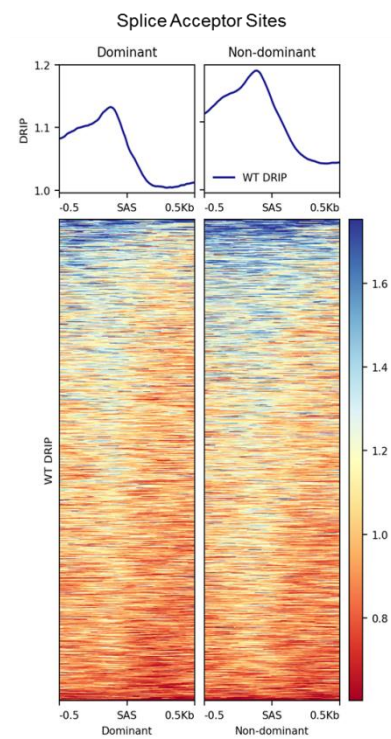

Fig.S10

A

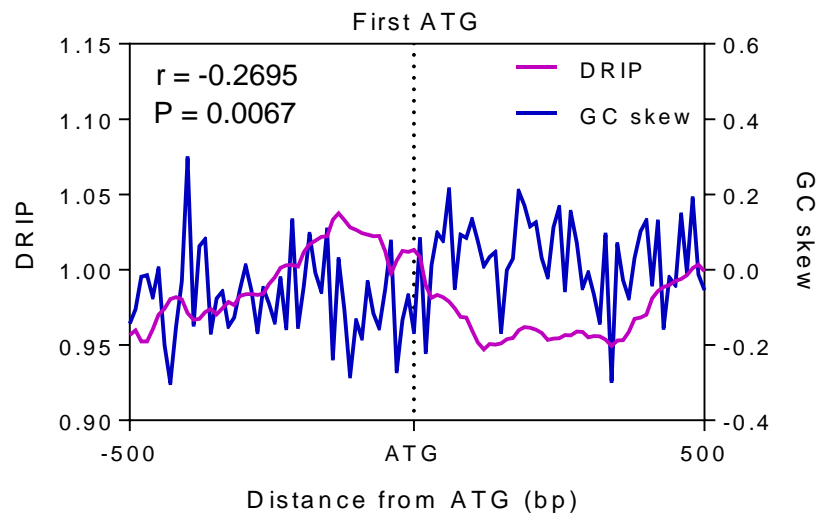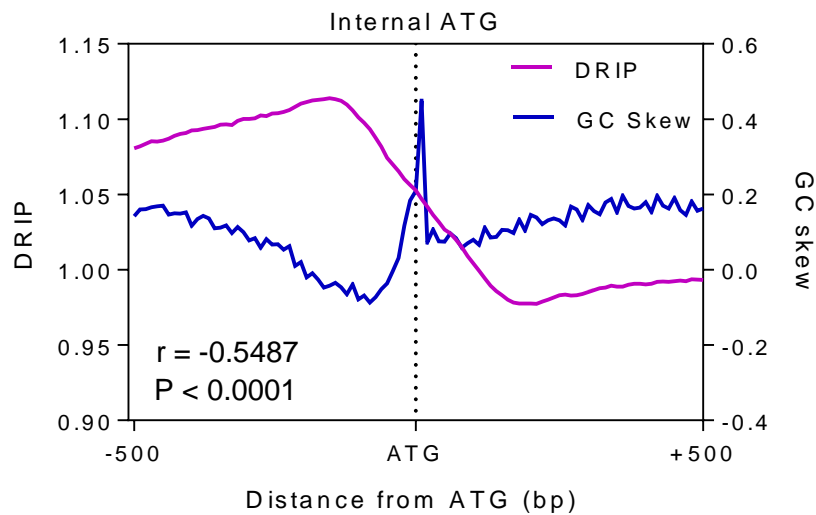

B

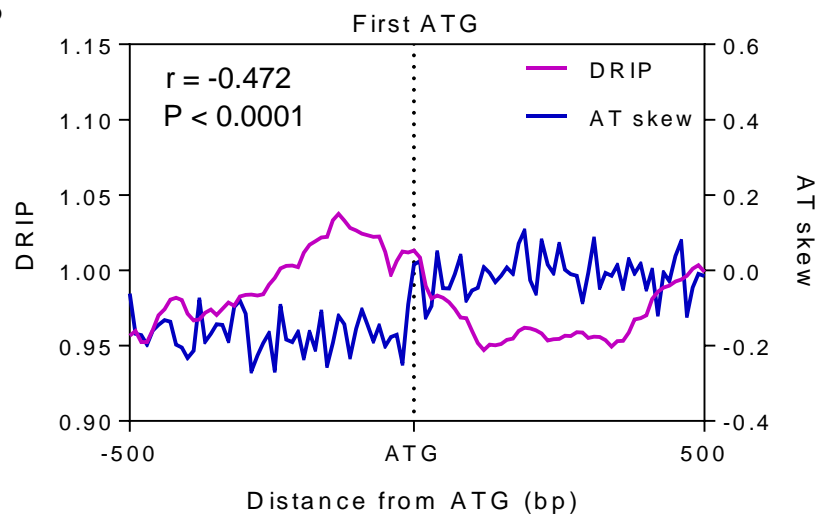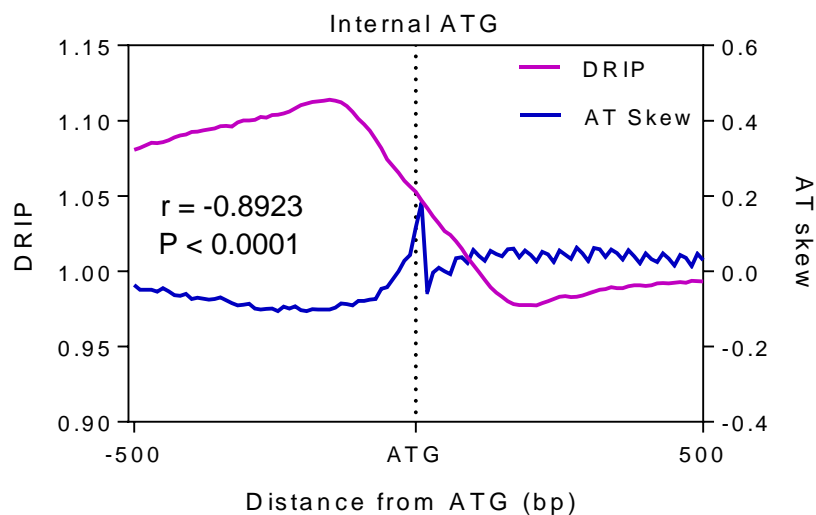

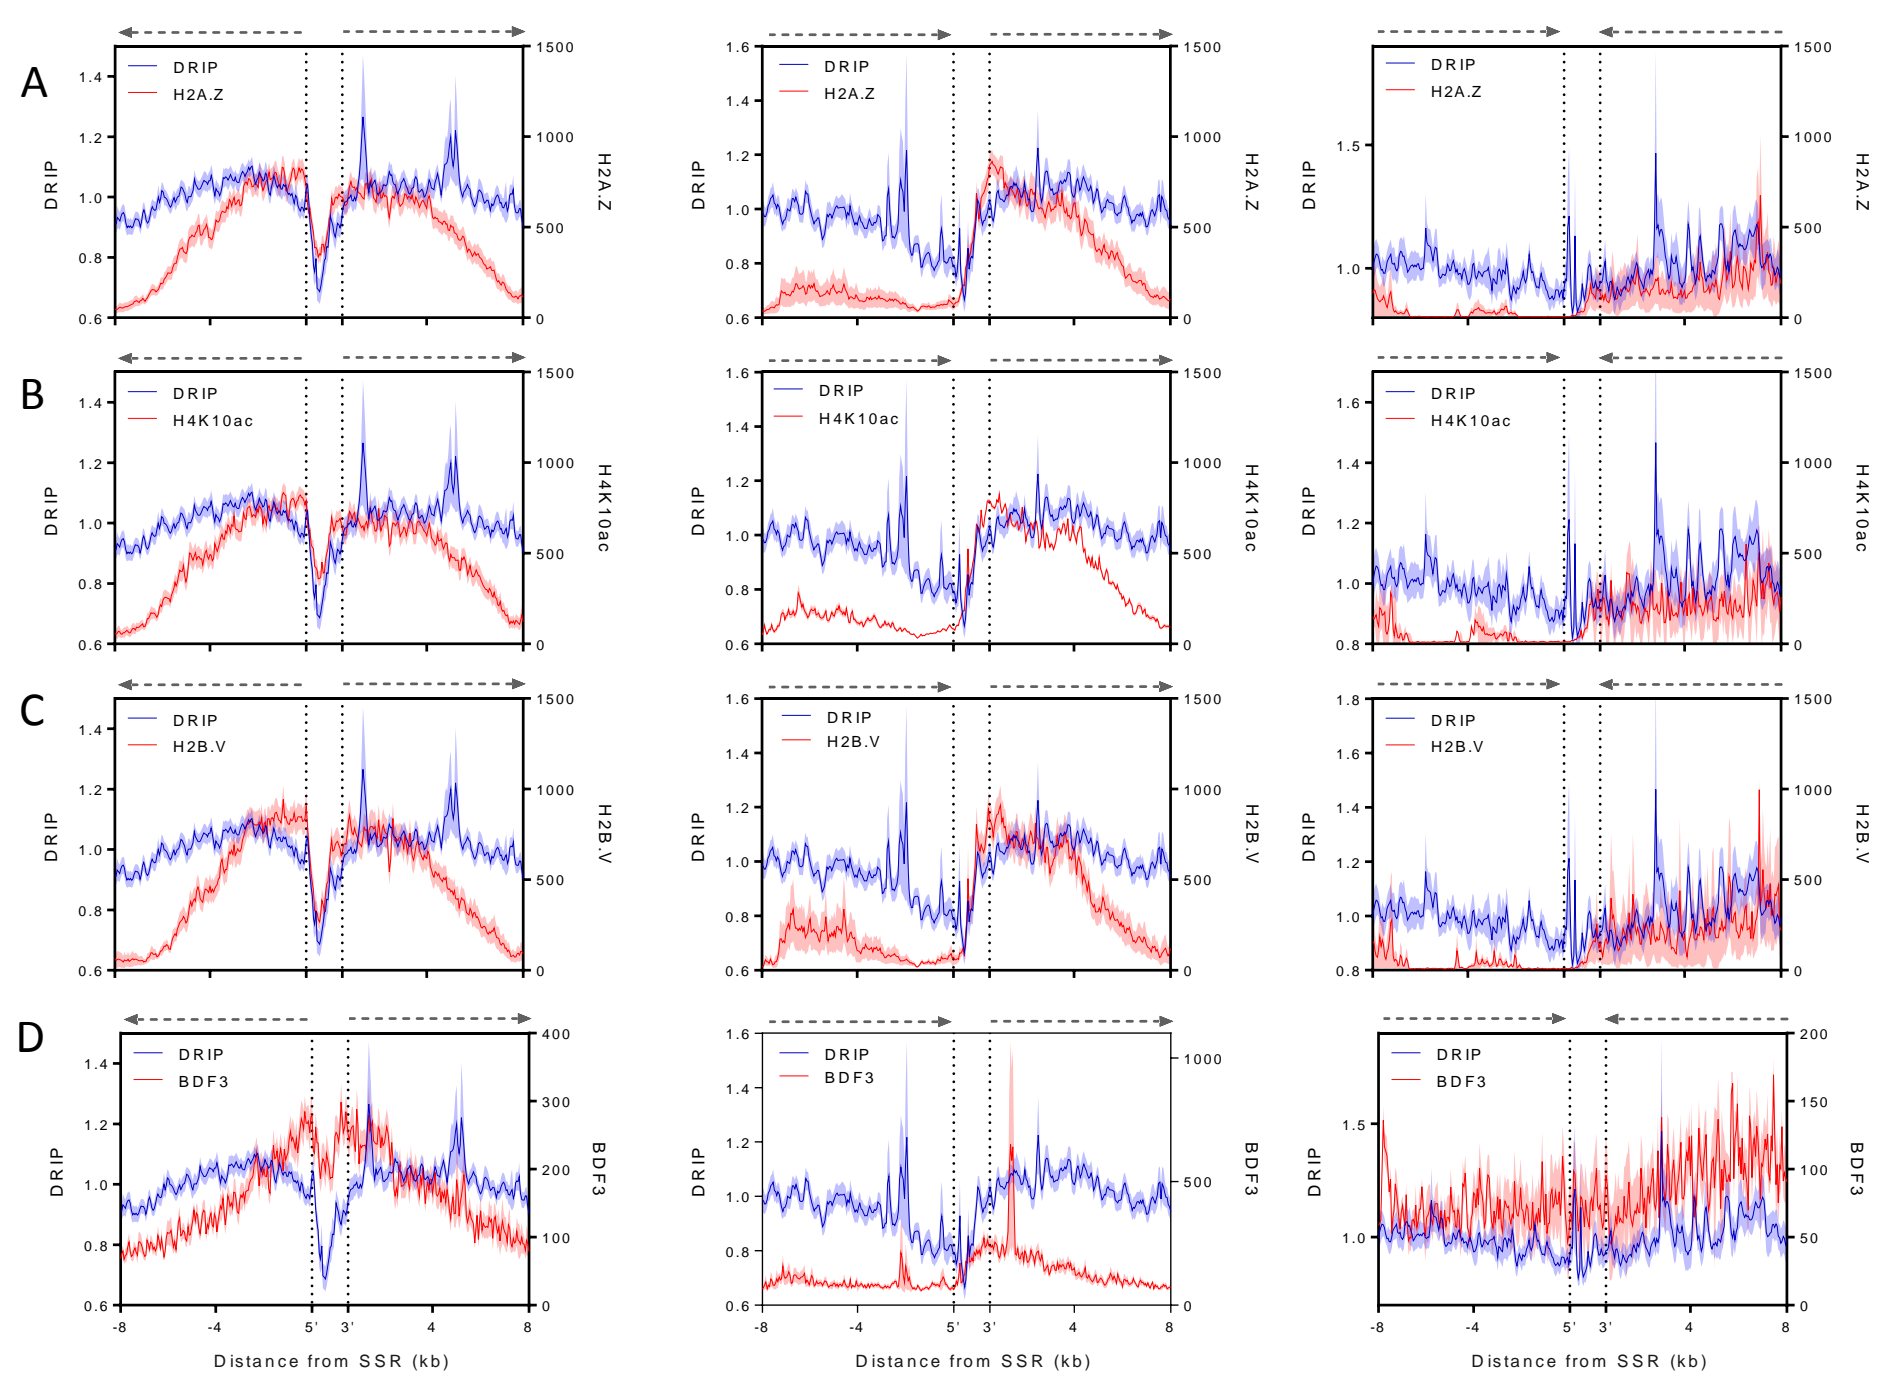

Fig.S12

**A**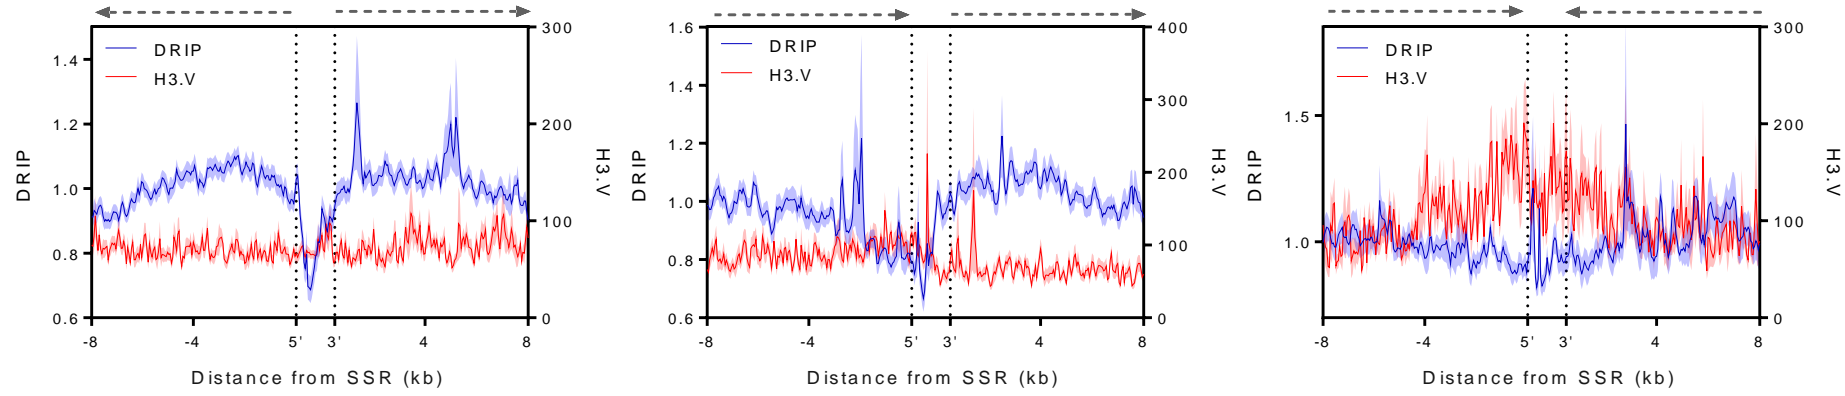**B**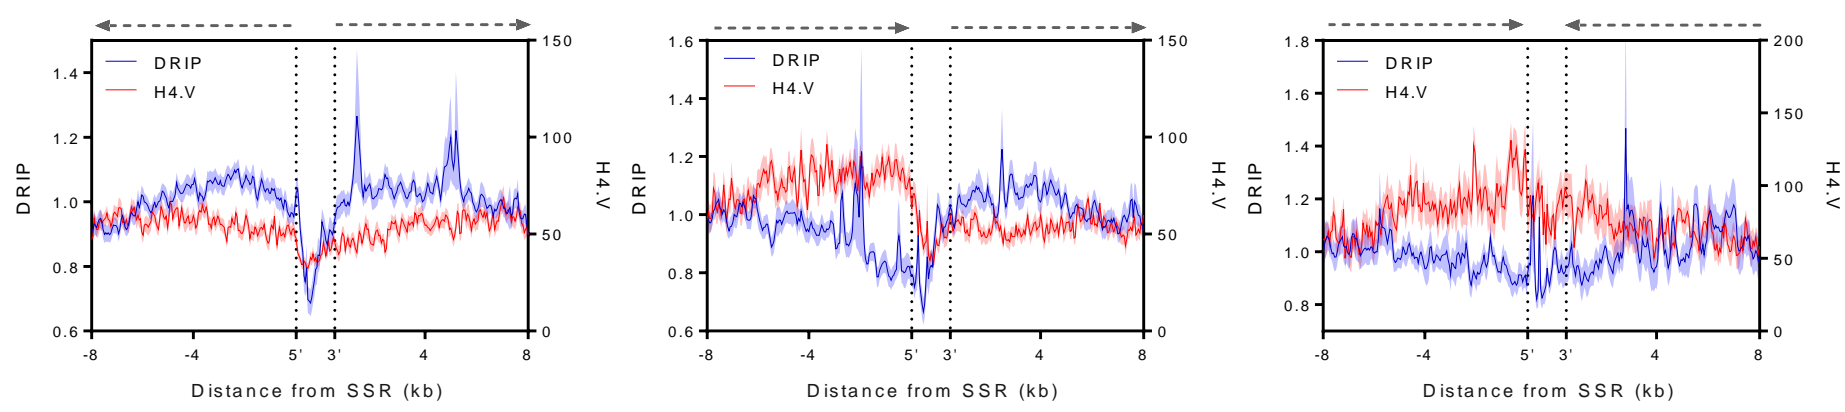

Fig.S13

| ID         | Name                                                                                  | Result count | Fold enrichment | P-value     | Benjamini   |
|------------|---------------------------------------------------------------------------------------|--------------|-----------------|-------------|-------------|
| GO:0005488 | binding                                                                               | 1509         | 1.13            | 7.88E-08    | 3.94E-06    |
| GO:0032559 | adenyl ribonucleotide binding                                                         | 397          | 1.32            | 3.16E-06    | 4.84E-05    |
| GO:0030554 | adenyl nucleotide binding                                                             | 401          | 1.32            | 3.28E-06    | 4.84E-05    |
| GO:0005524 | ATP binding                                                                           | 395          | 1.32            | 3.87E-06    | 4.84E-05    |
| GO:0032555 | purine ribonucleotide binding                                                         | 453          | 1.27            | 1.42E-05    | 6.55E-05    |
| GO:0032549 | ribonucleoside binding                                                                | 452          | 1.26            | 1.55E-05    | 6.55E-05    |
| GO:0001882 | nucleoside binding                                                                    | 452          | 1.26            | 1.55E-05    | 6.55E-05    |
| GO:0032550 | purine ribonucleoside binding                                                         | 452          | 1.26            | 1.55E-05    | 6.55E-05    |
| GO:0001883 | purine nucleoside binding                                                             | 452          | 1.26            | 1.55E-05    | 6.55E-05    |
| GO:0017076 | purine nucleotide binding                                                             | 457          | 1.26            | 1.59E-05    | 6.55E-05    |
| GO:0097367 | carbohydrate derivative binding                                                       | 459          | 1.26            | 1.60E-05    | 6.55E-05    |
| GO:0032553 | ribonucleotide binding                                                                | 459          | 1.26            | 1.60E-05    | 6.55E-05    |
| GO:0035639 | purine ribonucleoside triphosphate binding                                            | 451          | 1.26            | 1.70E-05    | 6.55E-05    |
| GO:0003674 | molecular function                                                                    | 2075         | 1.07            | 3.08E-05    | 0.000109916 |
| GO:0000166 | nucleotide binding                                                                    | 490          | 1.23            | 6.03E-05    | 0.00018835  |
| GO:1901265 | nucleoside phosphate binding                                                          | 490          | 1.23            | 6.03E-05    | 0.00018835  |
| GO:0036094 | small molecule binding                                                                | 494          | 1.23            | 6.59E-05    | 0.000193732 |
| GO:0043168 | anion binding                                                                         | 480          | 1.23            | 7.04E-05    | 0.000195516 |
| GO:0005515 | protein binding                                                                       | 636          | 1.18            | 0.000103838 | 0.000273259 |
| GO:0097159 | organic cyclic compound binding                                                       | 842          | 1.14            | 0.000176392 | 0.000419981 |
| GO:1901363 | heterocyclic compound binding                                                         | 842          | 1.14            | 0.000176392 | 0.000419981 |
| GO:0043167 | ion binding                                                                           | 678          | 1.16            | 0.000262957 | 0.000597629 |
| GO:0016887 | ATPase activity                                                                       | 112          | 1.44            | 0.001624295 | 0.003531077 |
| GO:0042623 | ATPase activity, coupled                                                              | 87           | 1.49            | 0.002549561 | 0.005311585 |
| GO:0016462 | pyrophosphatase activity                                                              | 200          | 1.26            | 0.004109398 | 0.007902688 |
| GO:0016818 | hydrolase activity, acting on acid anhydrides,<br>in phosphorus-containing anhydrides | 200          | 1.26            | 0.004109398 | 0.007902688 |
| GO:0017111 | nucleoside-triphosphatase activity                                                    | 195          | 1.27            | 0.004382276 | 0.008115326 |
| GO:0016817 | hydrolase activity, acting on acid anhydrides                                         | 201          | 1.26            | 0.004966523 | 0.008868791 |
| GO:0008026 | ATP-dependent helicase activity                                                       | 43           | 1.66            | 0.008623755 | 0.014372925 |
| GO:0070035 | purine NTP-dependent helicase activity                                                | 43           | 1.66            | 0.008623755 | 0.014372925 |
| GO:0016787 | hydrolase activity                                                                    | 421          | 1.14            | 0.009754508 | 0.015733077 |
| GO:0016773 | phosphotransferase activity, alcohol<br>group as acceptor                             | 151          | 1.25            | 0.015078862 | 0.023560721 |
| GO:0004386 | helicase activity                                                                     | 51           | 1.49            | 0.018276414 | 0.027235004 |
| GO:0004672 | protein kinase activity                                                               | 122          | 1.27            | 0.018519803 | 0.027235004 |
| GO:0016301 | kinase activity                                                                       | 161          | 1.23            | 0.020322907 | 0.028621349 |
| GO:0004016 | adenylate cyclase activity                                                            | 41           | 1.56            | 0.020607371 | 0.028621349 |
| GO:0003729 | mRNA binding                                                                          | 110          | 1.28            | 0.022840644 | 0.030393689 |
| GO:0003774 | motor activity                                                                        | 59           | 1.42            | 0.023099204 | 0.030393689 |
| GO:0004674 | protein serine/threonine kinase activity                                              | 75           | 1.35            | 0.024219967 | 0.030838196 |
| GO:0009975 | cyclase activity                                                                      | 41           | 1.53            | 0.024670556 | 0.030838196 |
| GO:0003723 | RNA binding                                                                           | 249          | 1.16            | 0.027699753 | 0.032811201 |
| GO:0044822 | poly(A) RNA binding                                                                   | 110          | 1.27            | 0.027812196 | 0.032811201 |
| GO:0022804 | active transmembrane transporter activity                                             | 69           | 1.36            | 0.028217632 | 0.032811201 |
| GO:0008094 | DNA-dependent ATPase activity                                                         | 21           | 1.82            | 0.031811929 | 0.035760812 |
| GO:0003777 | microtubule motor activity                                                            | 55           | 1.4             | 0.032184731 | 0.035760812 |
| GO:0003676 | nucleic acid binding                                                                  | 436          | 1.11            | 0.033776143 | 0.036562734 |
| GO:0016772 | transferase activity, transferring<br>phosphorus-containing groups                    | 228          | 1.16            | 0.03436897  | 0.036562734 |
| GO:0005215 | transporter activity                                                                  | 138          | 1.21            | 0.036986137 | 0.038527226 |
| GO:0008017 | microtubule binding                                                                   | 44           | 1.42            | 0.044181551 | 0.045083215 |
| GO:0003824 | catalytic activity                                                                    | 1000         | 1.06            | 0.048957109 | 0.048957109 |

Table S1.
